# Supplementary material for: A nematic [60]fullerene supermolecule: when polyaddition leads to supramolecular self-organization at room temperature
Source: Royal Society of Chemistry journal article supplement (doi:10.1039/b700460e), 2007-01-01

## SUPPORTING INFORMATION

### A Nematic [60]Fullerene supermolecule: when polyaddition leads to supramolecular self-organization at room temperature

Hind Mamlouk, Benoit Heinrich, Cyril Bourgoigne, Bertrand Donnio, Daniel Guillon and Delphine Felder-Flesch,\*

Institut de Physique et Chimie des Matériaux de Strasbourg, Groupe des Matériaux Organiques, 23 rue du Loess, BP 43, 67034 Strasbourg Cedex 2, France

Correspondence to : [Delphine.Felder@ipcms.u-strasbg.fr](mailto:Delphine.Felder@ipcms.u-strasbg.fr)

#### TABLE OF CONTENTS

- $^1\text{H}$ ,  $^{13}\text{C}$  NMR ( $\text{CDCl}_3$ ), Mass spectrometry (MALDI-TOF) spectra, Gas Permeation Chromatogram, UV-visible spectrum of **1**
- Polarize optical microscope (POM) image of the nematic texture of compound **1**.
- Molecular modelling picture

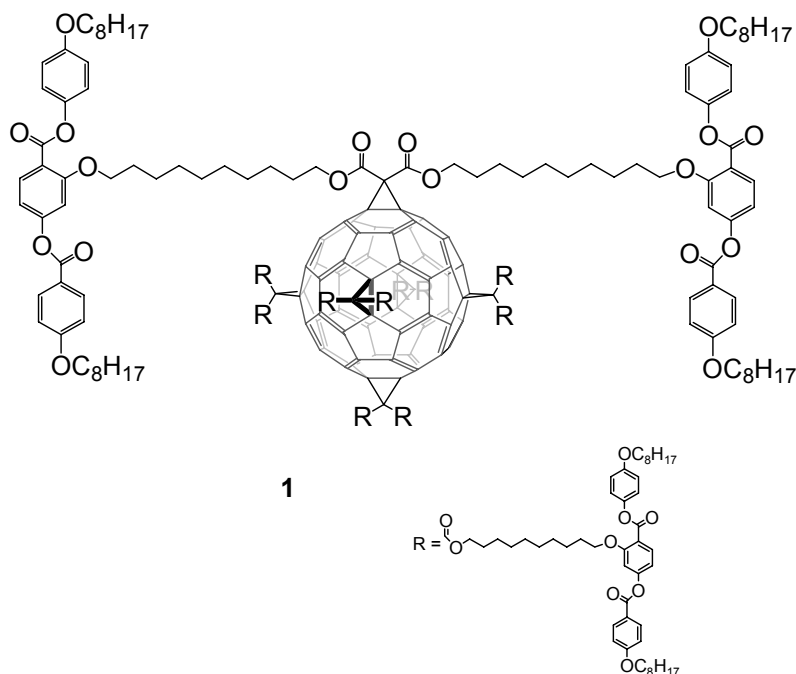

<sup>1</sup>H NMR (CDCl<sub>3</sub>, 300 MHz) of hexaadduct 1. (\* CH<sub>2</sub>Cl<sub>2</sub>)

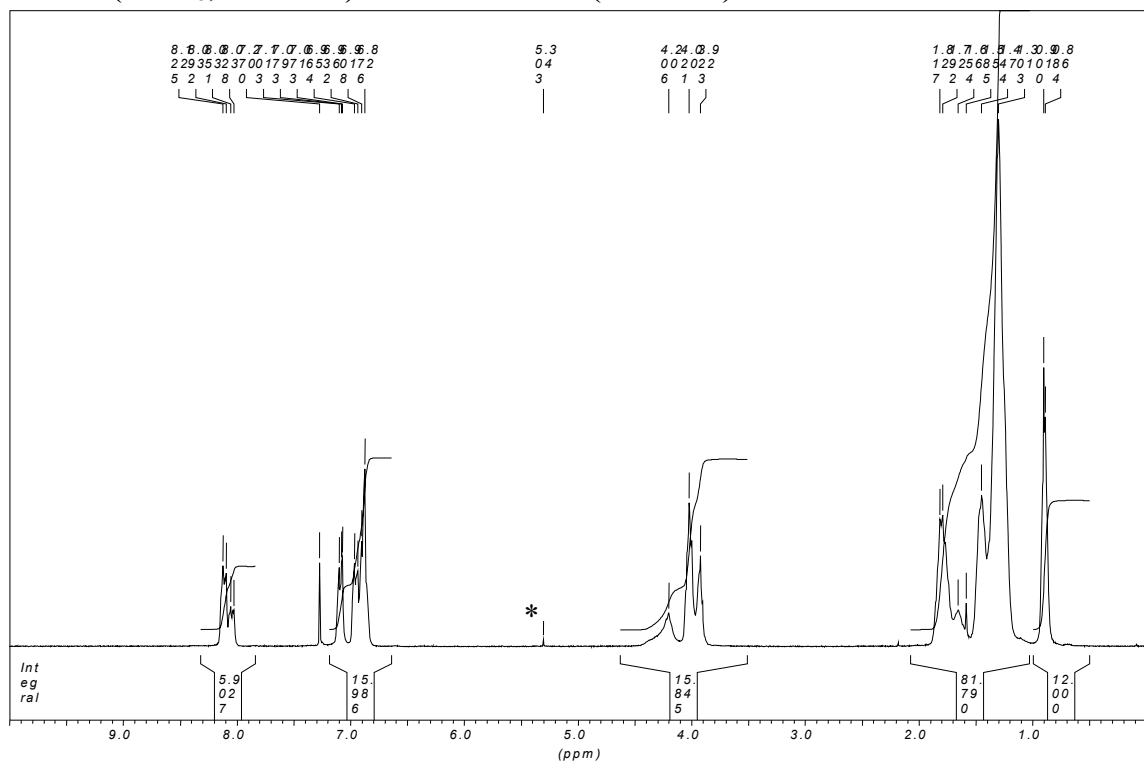



### Mass spectrometry spectrum (Maldi-TOF) of 1

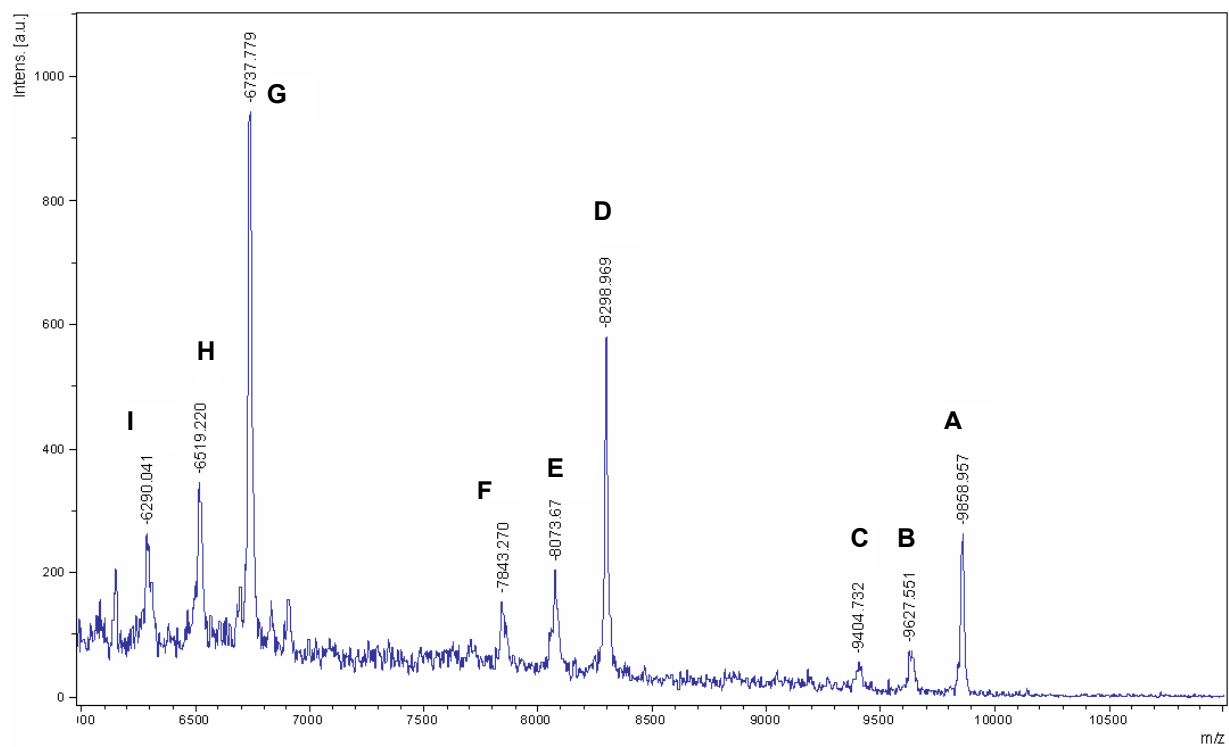

**A**  $[M - C_{14}H_{21}O_2]$

**B**  $[A - C_{15}H_{21}O_2]$

**C**  $[B - C_{14}H_{21}O_2]$

**D**  $[M - C_{95}H_{132}O_{18} \text{ (malonate)}]$

**E**  $[D - C_{14}H_{21}O_2]$

**F**  $[E - C_{15}H_{21}O_2]$

**G**  $[M - 2C_{95}H_{132}O_{18}]$

**H**  $[G - C_{14}H_{21}O_2]$

**I**  $[H - C_{15}H_{21}O_2]$

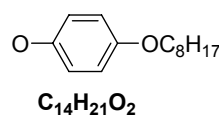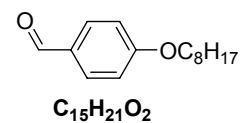

### Gas Permeation Chromatogram of 1.

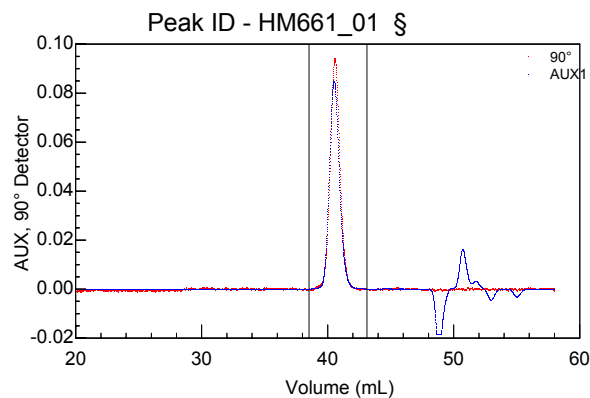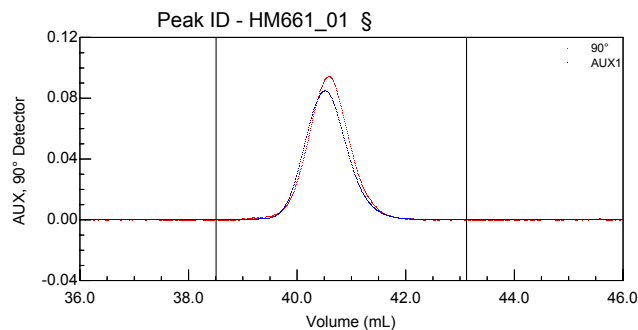

#### RESULTS

|                             |   | PEAK #1            |
|-----------------------------|---|--------------------|
| Volume (mL)                 | : | 38.508 - 43.117    |
| Slices                      | : | 554                |
| A2 (mol mL/g <sup>2</sup> ) | : | 0.000e+00          |
| Fit degree                  | : | 1                  |
| Injected Mass (g)           | : | 3.0600e-04         |
| dn/dc (mL/g)                | : | 0.153              |
| Polydispersity(Mw/Mn)       | : | 1.033±0.028 (2.7%) |
| Polydispersity(Mz/Mn)       | : | 1.078±0.073 (7%)   |

#### Molar Mass Moments (g/mol)

|    |   |                  |
|----|---|------------------|
| Mn | : | 1.579e+04 (1.7%) |
| Mw | : | 1.631e+04 (2.1%) |
| Mz | : | 1.703e+04 (6%)   |

#### R.M.S. Radius Moments (nm)

|    |   |          |
|----|---|----------|
| Rn | : | 0.0 (0%) |
| Rw | : | 0.0 (0%) |
| Rz | : | 0.0 (0%) |

**UV-Visible spectrum (CH<sub>2</sub>Cl<sub>2</sub>) of 1 ([1]: 3.75.10<sup>-6</sup> mol/L)**

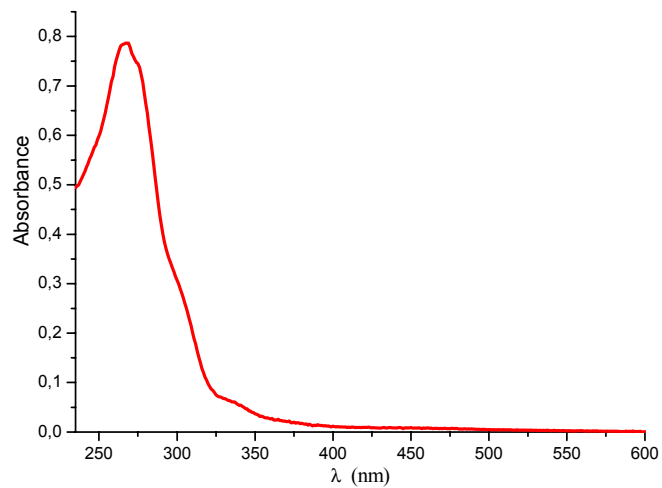

**Polarized optical microscope image of the nematic texture of compound 1 recorded at 55°C after cooling from isotropic.**

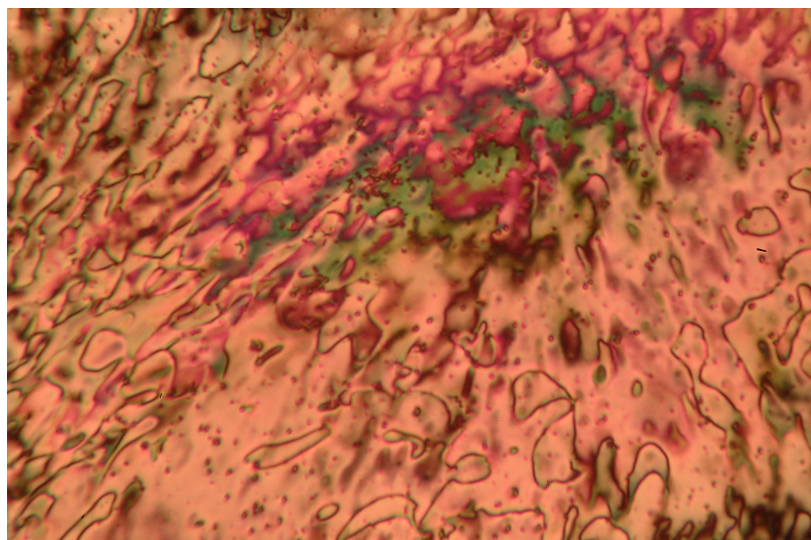

**Molecular modelling picture (View along the direction of the magnetic field) within the 3D cybotactic groups showing the hexagonal close packing of the supermolecules**

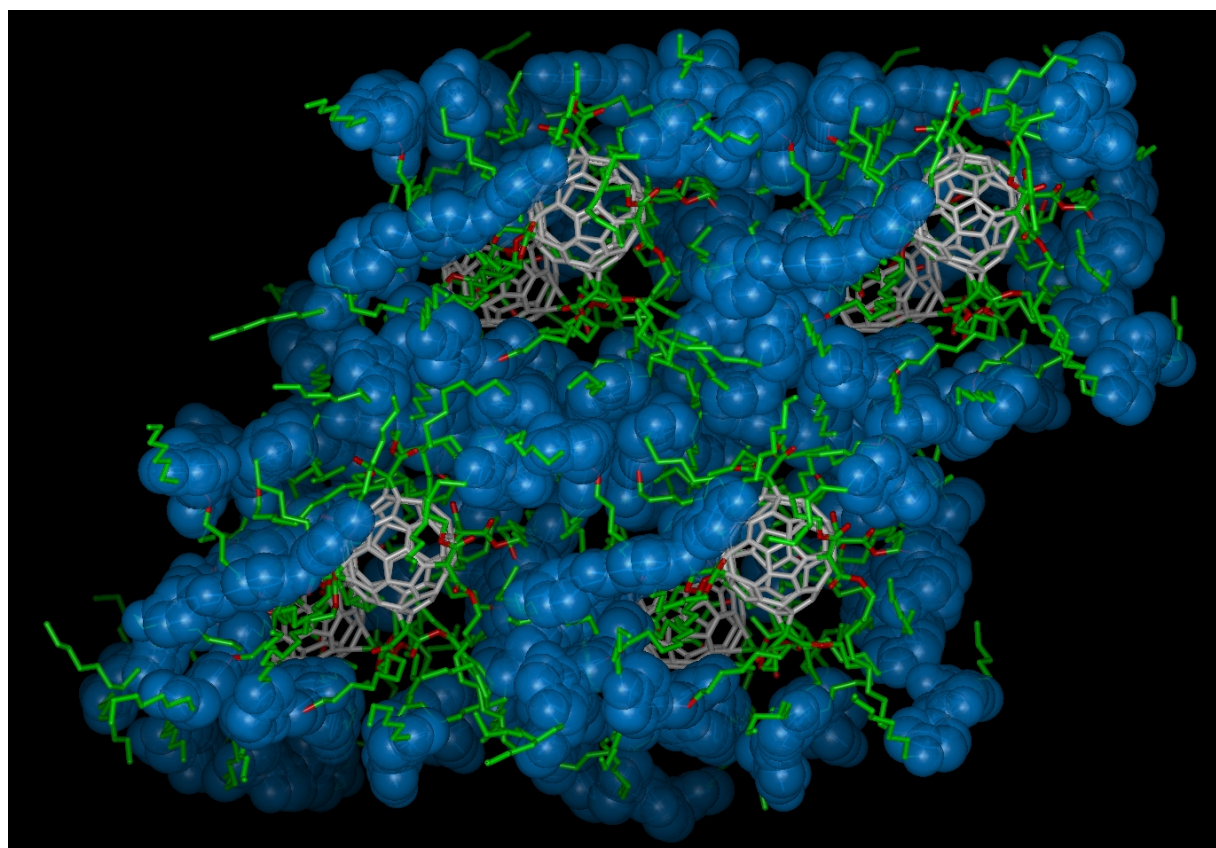

**Molecular modelling picture showing the molecular organization within the 3D cybotactic groups. A and B are the spacing as defined in the article.**

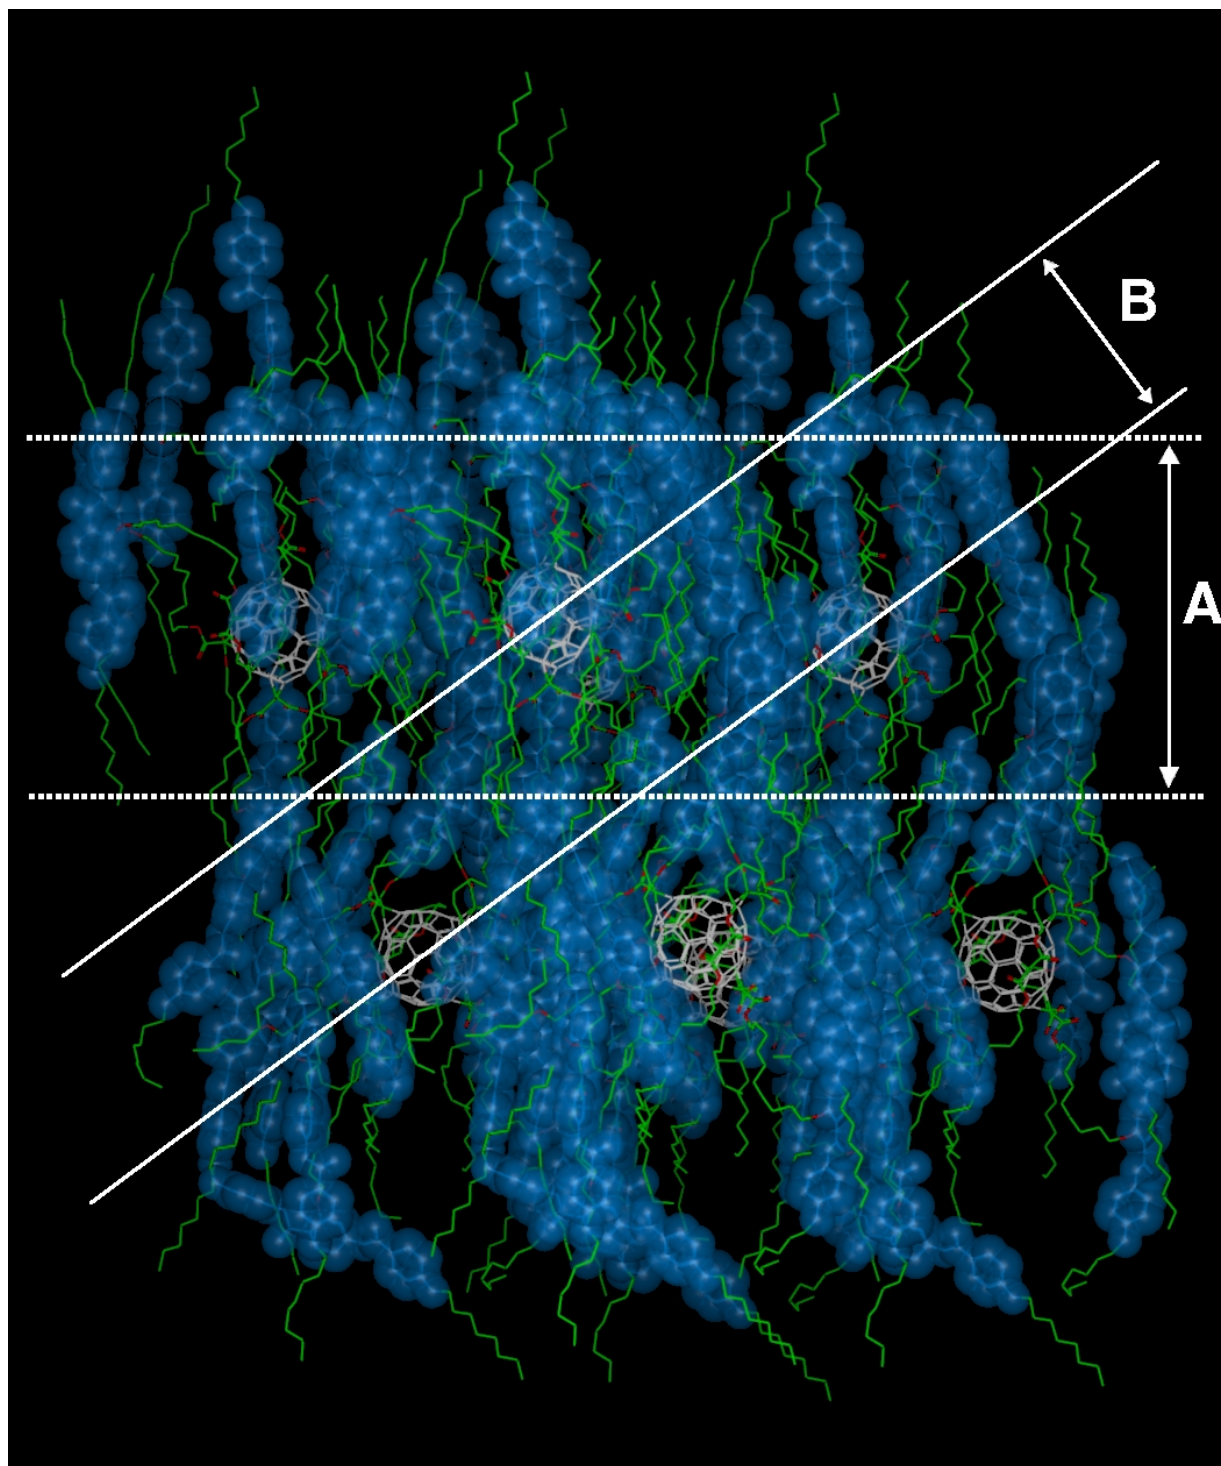

Supplement: b700460e.pdf [file b700460e.pdf]
